# Supplementary material
Source: PubMed Central journal article supplement (PMC3470642)
Supplement: supp_120427_renal-samuel-1-at.pdf [file supp_120427_renal-samuel-1-at.pdf]

## **Appendix 1 (as supplied by the authors): Causes of end-stage renal disease categorized as primary and secondary glomerulonephritis, diabetes and congenital renal disease**

### **Primary Glomerulonephritis**

Mesangial proliferative glomerulonephritis  
Minimal lesion glomerulonephritis  
Post-streptococcal glomerulonephritis  
Rapidly progressive glomerulonephritis  
Focal glomerulonephritis  
Glomerulonephritis, histologically not examined  
Severe nephrotic syndrome with focal sclerosis (pediatric patients)  
IgA nephropathy - proven by immunofluorescence  
Dense deposit disease - proven by immunofluorescence and/or electron microscopy (MPGN type II)  
Membranous nephropathy  
Membranoproliferative mesangiocapillary glomerulonephritis (MPGN Type II)  
Idiopathic crescentic glomerulonephritis (diffuse proliferative)  
Glomerulonephritis, histologically examined

### **Secondary Glomerulonephritis**

Polyarteritis nodosa  
Wegener's granulomatosis  
Systemic lupus erythematosus  
Henoch-Schönlein purpura  
Goodpasture's syndrome  
Scleroderma

### **Diabetes**

Diabetic nephropathy associated with type 1  
Diabetic nephropathy associated with type 2

### **Congenital Renal Disease**

Pyelonephritis/interstitial nephritis associated with neurogenic bladder  
Pyelonephritis/interstitial nephritis due to congenital obstructive uropathy with or without vesico-ureteric reflux  
Pyelonephritis/interstitial nephritis due to vesico-ureteric reflux without obstruction  
Cystic kidney disease, type unspecified  
Posterior urethral valves  
Congenital renal hypoplasia, specify  
Oligomegonephronic hypoplasia  
Segmental renal hypoplasia (Asplenic kidney)  
Congenital renal dysplasia with or without urinary tract malfunction  
Syndrome of agenesis of abdominal muscles (Prune Belly syndrome)

**Footnote:** Genetic and other causes of end-stage renal disease were not analysed and not shown on this list. The classification as shown above is adapted from the Canadian Organ Replacement Register data forms.
